# Hemodynamic and Blood-gas Effects of Innovar in Patients with Acquired Heart Disease

Sait Tarhan, M.D., Emerson A. Moffitt, M.D.,  
Richard O. Lundborg, M.D., Robert L. Frye, M.D.

The effects of Innovar on hemodynamics and blood gases were studied in 18 adult patients with advanced cardiac disease during analgesia and sedation for angiocardiology. No significant changes in cardiac index or rate, stroke volume, stroke work, or left ventricular systolic and diastolic pressures were observed. Femoral systolic pressure decreased, on the average, from 152 to 139 mm Hg; femoral diastolic pressure, from 74 to 67 mm Hg; mean femoral pressure, from 100 to 91 mm Hg. Systemic vascular resistance decreased from 40.4 to 35.8 units, while pulmonary resistance did not change.  $P_{aCO_2}$  increased from 35 to 40 mm Hg, whereas  $P_{aO_2}$  decreased from 76 to 57 mm Hg. All these changes were significant. (Key words: Innovar; Hemodynamic effects; Blood gases; Cardiac patients; Peripheral resistance.)

NEUROLEPTANALGESIA with Innovar, a combination of droperidol and fentanyl in a 50:1 ratio (2.5:0.05 mg/ml), has been advocated for use in anesthesia for cardiac surgery,<sup>1</sup> in poor-risk patients,<sup>2</sup> and as premedication.<sup>3</sup> The advantages put forth include cardiovascular stability and a relative absence of undesirable side effects.<sup>4</sup> These conclusions have been derived either from clinical impressions<sup>1</sup> or from hemodynamic studies of patients who had no known cardiovascular disease.<sup>4,5</sup> Because the drug is recommended specifically for patients undergoing open-heart surgery and for poor-risk patients, we have assessed the acute hemodynamic and respiratory effects of Innovar on patients with advanced cardiac disease.

We gave Innovar to 18 adult patients dur-

ing diagnostic cardiac catheterization for analgesia and sedation during angiocardiology and evaluated its effects on hemodynamics and blood gases. All patients were moderately or severely incapacitated, in class III or IV according to the New York Heart Association Classification.

## Methods

The ages of the patients (11 men and seven women) ranged from 23 to 78 years. Sixteen patients had valvular disease (table 1): six of these had aortic stenosis and three, mitral stenosis. Two patients had cardiomyopathies of unknown cause. Both of these patients had left ventricular end-diastolic pressures above 12 mm Hg. All patients had fasted overnight. None had received premedication. As part of the diagnostic procedure, a catheter was manipulated into the left ventricle of each patient via the brachial artery and an indwelling needle was placed in the femoral artery. Catheters and needles were inserted using local anesthesia (1 per cent lidocaine without epinephrine).

Using a strain-gauge (Statham Model P23b), left ventricular and femoral arterial pressures were recorded simultaneously by a galvanometer-oscillograph assembly and a visual recorder (Visicorder, Model 1012). Pulmonary arterial pressures of 13 patients were measured simultaneously with separate catheters. In nine patients, cardiac outputs were measured by the indicator-dilution technique of Hamilton.<sup>6</sup> Indocyanine green injected into the left ventricle was sampled from the femoral artery. In the other nine patients, cardiac outputs were determined by the direct Fick method because of significant distortions of the disappearance slopes of the dye curves. Heart rate was obtained from the electrocardiogram. With the patient breathing ambient air,  $P_{aO_2}$ ,  $pH$ ,

Received from the Mayo Clinic and Mayo Foundation: Department of Anesthesiology (Drs. Tarhan, Moffitt, and Lundborg) and Division of Cardiovascular Diseases and Internal Medicine (Dr. Frye), Rochester, Minnesota. Accepted for publication November 23, 1970. Supported in part by Research Grant GM-14919 from the National Institutes of Health, Public Health Service.

TABLE 1. Types of Cardiac Disease\* in 18 Patients Undergoing Cardiac Catheterization

| Patient | Aortic Valve |               | Mitral Valve |               | Tricuspid Valve, Insufficiency | Cardiomyopathy |
|---------|--------------|---------------|--------------|---------------|--------------------------------|----------------|
|         | Stenosis     | Insufficiency | Stenosis     | Insufficiency |                                |                |
| 1       |              | ++            |              |               |                                |                |
| 2       |              |               |              |               |                                | +              |
| 3       |              |               |              | ++            |                                | +              |
| 4       |              | ++            | ++           |               |                                |                |
| 5       |              |               |              | +++           |                                |                |
| 6       | ++           |               |              |               |                                |                |
| 7       |              |               |              | +++           |                                |                |
| 8       | ++           | +             |              |               |                                |                |
| 9       |              |               |              | +++           | +                              |                |
| 10      | +            |               | ++           | ++            |                                |                |
| 11      |              |               |              | +++           | +                              |                |
| 12      | +++          |               |              |               | ++                             |                |
| 13      |              |               |              |               |                                | +              |
| 14      | +++          |               |              |               |                                |                |
| 15      |              |               |              | +++           |                                |                |
| 16      | +++          |               |              |               |                                |                |
| 17      |              |               |              | ++            |                                |                |
| 18      |              |               | +++          |               |                                |                |

\* Severity: mild +, moderate ++, severe +++.

and PaCO<sub>2</sub> in femoral arterial blood were determined, using electrodes (Instrumentation Laboratories) maintained at 37 C. Oxygen consumption was determined by analysis of expired air collected for three minutes in a Douglas bag.

After completion of control measurements, Innovar was given intravenously over a three-minute period, in doses that ranged from 1 ml/23 kg to 1 ml/34 kg of body weight, depending upon the condition of the patient. Total amounts averaged 2.8 ml (range 2 to 3.5 ml). Innovar's peak respiratory effects occur about ten minutes after administration,<sup>5</sup> and previous observations in our laboratory had suggested that the peak cardiovascular changes occurred at approximately the same time. Therefore, a second set of measurements was made ten minutes after the injection of Innovar. After completion of these measurements, angiocardiography was carried out with contrast medium (Renovist), 1 to 1.5 ml/kg body weight.

Systemic and pulmonary resistances were calculated according to the formula:

$$\text{Units} = \frac{\text{mean pressure (mm Hg)}}{\text{flow} \left( \frac{\text{l/min}}{\text{m}^2} \right)} \quad (1)$$

Left ventricular stroke work was calculated by the formula:

$$\text{LVS}W \text{ (gm-m)} = (\text{LVSP} - \text{LVEDP}) \times \text{SV} \times 0.0144 \quad (2)$$

LVSP is mean left ventricular systolic pressure obtained by planimetric integration, LVEDP is left ventricular end-diastolic pressure, and SV is stroke volume obtained from cardiac output and heart rate. The factor 0.0144 is a constant that corrects for density of blood and for the conversion of mm Hg to cm H<sub>2</sub>O and cm to meters, thus allowing stroke work to be expressed in conventional units. Paired data (before and ten minutes after Innovar) were analyzed by Student's *t* test, with *P* < 0.05 taken as the level of significance.

### Results

Results are summarized in tables 2, 3, and 4. Mean cardiac index was unaltered, 2.8 ± 0.09 l/min/m<sup>2</sup> before and after Innovar. Left ventricular systolic and end-diastolic pressures, stroke volume, and heart rate did not change significantly. Although stroke work decreased in 13 of 18 patients, mean values were not significantly changed, but systemic systolic, diastolic, and mean pressures decreased signifi-

TABLE 2. Changes in Hemodynamics after Administration of Innovar

| Patient | Femoral Arterial Systolic Pressure (mm Hg) |        | Femoral Arterial Diastolic Pressure (mm Hg) |        | Left Ventricular Systolic Pressure (mm Hg) |        | Left Ventricular End Diastolic Pressure (mm Hg) |        | Mean Arterial Pressure (mm Hg) |        | Pulmonary Trunk Systolic Pressure (mm Hg) |        | Pulmonary Trunk Diastolic Pressure (mm Hg) |        | Circulation (l/min/m <sup>2</sup> ) |        | Stroke Volume (ml) |        | Heart Rate (beats/min) |        |
|---------|--------------------------------------------|--------|---------------------------------------------|--------|--------------------------------------------|--------|-------------------------------------------------|--------|--------------------------------|--------|-------------------------------------------|--------|--------------------------------------------|--------|-------------------------------------|--------|--------------------|--------|------------------------|--------|
|         | Control                                    | 10 Min | Control                                     | 10 Min | Control                                    | 10 Min | Control                                         | 10 Min | Control                        | 10 Min | Control                                   | 10 Min | Control                                    | 10 Min | Control                             | 10 Min | Control            | 10 Min | Control                | 10 Min |
| 1       | 180                                        | 152    | 58                                          | 45     | 170                                        | 148    | 17                                              | 10     | 100                            | 81     | —                                         | —      | 2.7                                        | 3.3    | 70                                  | 77     | 60                 | 60     | 84                     | 60     |
| 2       | 158                                        | 144    | 55                                          | 55     | 142                                        | 124    | 17                                              | 22     | 100                            | 60     | —                                         | —      | 3.7                                        | 3.8    | 82                                  | 81     | 84                 | 78     | 84                     | 78     |
| 3       | 173                                        | 171    | 65                                          | 66     | 111                                        | 115    | 21                                              | 24     | 67                             | 72     | 10                                        | 10     | 3.1                                        | 2.2    | 60                                  | 54     | 70                 | 65     | 70                     | 65     |
| 4       | 173                                        | 171    | 65                                          | 66     | 162                                        | 176    | 12                                              | 13     | 103                            | 103    | 81                                        | 81     | 3.4                                        | 3.4    | 80                                  | 110    | 80                 | 58     | 80                     | 58     |
| 5       | 127                                        | 115    | 78                                          | 68     | 104                                        | 104    | 20                                              | 15     | 14                             | 84     | 00                                        | 00     | 1.4                                        | 1.4    | 23                                  | 26     | 90                 | 84     | 84                     | 84     |
| 6       | 170                                        | 182    | 80                                          | 83     | 224                                        | 243    | 15                                              | 23     | 110                            | 110    | —                                         | —      | 2.6                                        | 2.9    | 69                                  | 75     | 72                 | 75     | 72                     | 75     |
| 7       | 168                                        | 175    | 78                                          | 80     | 144                                        | 152    | 24                                              | 21     | 108                            | 112    | 102                                       | 99     | 3.3                                        | 2.4    | 70                                  | 60     | 60                 | 60     | 72                     | 72     |
| 8       | 178                                        | 120    | 60                                          | 53     | 212                                        | 174    | 38                                              | 12     | 103                            | 75     | 36                                        | 38     | 1.8                                        | 3.4    | 88                                  | 82     | 78                 | 78     | 78                     | 78     |
| 9       | 122                                        | 119    | 75                                          | 70     | 118                                        | 113    | 30                                              | 28     | 91                             | 80     | 65                                        | 77     | 4.5                                        | 2.1    | 40                                  | 56     | 78                 | 78     | 78                     | 78     |
| 10      | 203                                        | 203    | 105                                         | 84     | 220                                        | 195    | 15                                              | 15     | 138                            | 117    | 52                                        | 38     | 10                                         | 3.0    | 70                                  | 69     | 72                 | 72     | 72                     | 72     |
| 11      | 130                                        | 125    | 70                                          | 75     | 103                                        | 103    | 20                                              | 20     | 92                             | 92     | 78                                        | 61     | 2.1                                        | 1.8    | 70                                  | 65     | 54                 | 54     | 54                     | 54     |
| 12      | 133                                        | 125    | 58                                          | 58     | 192                                        | 190    | 20                                              | 20     | 83                             | 80     | 55                                        | 61     | 2.0                                        | 1.7    | 50                                  | 36     | 54                 | 60     | 54                     | 60     |
| 13      | 59                                         | 101    | 55                                          | 60     | 87                                         | 96     | 22                                              | 18     | 68                             | 76     | 45                                        | 44     | 25                                         | 4.3    | 121                                 | 77     | 68                 | 95     | 68                     | 95     |
| 14      | 60                                         | 101    | 75                                          | 75     | 121                                        | 141    | 14                                              | 14     | 60                             | 64     | 64                                        | —      | 2.7                                        | 3.5    | 43                                  | 17     | 17                 | 17     | 17                     | 17     |
| 15      | 61                                         | 101    | 75                                          | 75     | 121                                        | 141    | 14                                              | 14     | 60                             | 64     | 64                                        | —      | 2.7                                        | 3.5    | 43                                  | 17     | 17                 | 17     | 17                     | 17     |
| 16      | 61                                         | 101    | 75                                          | 75     | 121                                        | 141    | 14                                              | 14     | 60                             | 64     | 64                                        | —      | 2.7                                        | 3.5    | 43                                  | 17     | 17                 | 17     | 17                     | 17     |
| 17      | 61                                         | 101    | 75                                          | 75     | 121                                        | 141    | 14                                              | 14     | 60                             | 64     | 64                                        | —      | 2.7                                        | 3.5    | 43                                  | 17     | 17                 | 17     | 17                     | 17     |
| 18      | 61                                         | 101    | 75                                          | 75     | 121                                        | 141    | 14                                              | 14     | 60                             | 64     | 64                                        | —      | 2.7                                        | 3.5    | 43                                  | 17     | 17                 | 17     | 17                     | 17     |
| 19      | 61                                         | 101    | 75                                          | 75     | 121                                        | 141    | 14                                              | 14     | 60                             | 64     | 64                                        | —      | 2.7                                        | 3.5    | 43                                  | 17     | 17                 | 17     | 17                     | 17     |
| 20      | 61                                         | 101    | 75                                          | 75     | 121                                        | 141    | 14                                              | 14     | 60                             | 64     | 64                                        | —      | 2.7                                        | 3.5    | 43                                  | 17     | 17                 | 17     | 17                     | 17     |
| 21      | 61                                         | 101    | 75                                          | 75     | 121                                        | 141    | 14                                              | 14     | 60                             | 64     | 64                                        | —      | 2.7                                        | 3.5    | 43                                  | 17     | 17                 | 17     | 17                     | 17     |
| 22      | 61                                         | 101    | 75                                          | 75     | 121                                        | 141    | 14                                              | 14     | 60                             | 64     | 64                                        | —      | 2.7                                        | 3.5    | 43                                  | 17     | 17                 | 17     | 17                     | 17     |
| 23      | 61                                         | 101    | 75                                          | 75     | 121                                        | 141    | 14                                              | 14     | 60                             | 64     | 64                                        | —      | 2.7                                        | 3.5    | 43                                  | 17     | 17                 | 17     | 17                     | 17     |
| 24      | 61                                         | 101    | 75                                          | 75     | 121                                        | 141    | 14                                              | 14     | 60                             | 64     | 64                                        | —      | 2.7                                        | 3.5    | 43                                  | 17     | 17                 | 17     | 17                     | 17     |
| 25      | 61                                         | 101    | 75                                          | 75     | 121                                        | 141    | 14                                              | 14     | 60                             | 64     | 64                                        | —      | 2.7                                        | 3.5    | 43                                  | 17     | 17                 | 17     | 17                     | 17     |
| 26      | 61                                         | 101    | 75                                          | 75     | 121                                        | 141    | 14                                              | 14     | 60                             | 64     | 64                                        | —      | 2.7                                        | 3.5    | 43                                  | 17     | 17                 | 17     | 17                     | 17     |
| 27      | 61                                         | 101    | 75                                          | 75     | 121                                        | 141    | 14                                              | 14     | 60                             | 64     | 64                                        | —      | 2.7                                        | 3.5    | 43                                  | 17     | 17                 | 17     | 17                     | 17     |
| 28      | 61                                         | 101    | 75                                          | 75     | 121                                        | 141    | 14                                              | 14     | 60                             | 64     | 64                                        | —      | 2.7                                        | 3.5    | 43                                  | 17     | 17                 | 17     | 17                     | 17     |
| 29      | 61                                         | 101    | 75                                          | 75     | 121                                        | 141    | 14                                              | 14     | 60                             | 64     | 64                                        | —      | 2.7                                        | 3.5    | 43                                  | 17     | 17                 | 17     | 17                     | 17     |
| 30      | 61                                         | 101    | 75                                          | 75     | 121                                        | 141    | 14                                              | 14     | 60                             | 64     | 64                                        | —      | 2.7                                        | 3.5    | 43                                  | 17     | 17                 | 17     | 17                     | 17     |
| 31      | 61                                         | 101    | 75                                          | 75     | 121                                        | 141    | 14                                              | 14     | 60                             | 64     | 64                                        | —      | 2.7                                        | 3.5    | 43                                  | 17     | 17                 | 17     | 17                     | 17     |
| 32      | 61                                         | 101    | 75                                          | 75     | 121                                        | 141    | 14                                              | 14     | 60                             | 64     | 64                                        | —      | 2.7                                        | 3.5    | 43                                  | 17     | 17                 | 17     | 17                     | 17     |
| 33      | 61                                         | 101    | 75                                          | 75     | 121                                        | 141    | 14                                              | 14     | 60                             | 64     | 64                                        | —      | 2.7                                        | 3.5    | 43                                  | 17     | 17                 | 17     | 17                     | 17     |
| 34      | 61                                         | 101    | 75                                          | 75     | 121                                        | 141    | 14                                              | 14     | 60                             | 64     | 64                                        | —      | 2.7                                        | 3.5    | 43                                  | 17     | 17                 | 17     | 17                     | 17     |
| 35      | 61                                         | 101    | 75                                          | 75     | 121                                        | 141    | 14                                              | 14     | 60                             | 64     | 64                                        | —      | 2.7                                        | 3.5    | 43                                  | 17     | 17                 | 17     | 17                     | 17     |
| 36      | 61                                         | 101    | 75                                          | 75     | 121                                        | 141    | 14                                              | 14     | 60                             | 64     | 64                                        | —      | 2.7                                        | 3.5    | 43                                  | 17     | 17                 | 17     | 17                     | 17     |
| 37      | 61                                         | 101    | 75                                          | 75     | 121                                        | 141    | 14                                              | 14     | 60                             | 64     | 64                                        | —      | 2.7                                        | 3.5    | 43                                  | 17     | 17                 | 17     | 17                     | 17     |
| 38      | 61                                         | 101    | 75                                          | 75     | 121                                        | 141    | 14                                              | 14     | 60                             | 64     | 64                                        | —      | 2.7                                        | 3.5    | 43                                  | 17     | 17                 | 17     | 17                     | 17     |
| 39      | 61                                         | 101    | 75                                          | 75     | 121                                        | 141    | 14                                              | 14     | 60                             | 64     | 64                                        | —      | 2.7                                        | 3.5    | 43                                  | 17     | 17                 | 17     | 17                     | 17     |
| 40      | 61                                         | 101    | 75                                          | 75     | 121                                        | 141    | 14                                              | 14     | 60                             | 64     | 64                                        | —      | 2.7                                        | 3.5    | 43                                  | 17     | 17                 | 17     | 17                     | 17     |
| 41      | 61                                         | 101    | 75                                          | 75     | 121                                        | 141    | 14                                              | 14     | 60                             | 64     | 64                                        | —      | 2.7                                        | 3.5    | 43                                  | 17     | 17                 | 17     | 17                     | 17     |
| 42      | 61                                         | 101    | 75                                          | 75     | 121                                        | 141    | 14                                              | 14     | 60                             | 64     | 64                                        | —      | 2.7                                        | 3.5    | 43                                  | 17     | 17                 | 17     | 17                     | 17     |
| 43      | 61                                         | 101    | 75                                          | 75     | 121                                        | 141    | 14                                              | 14     | 60                             | 64     | 64                                        | —      | 2.7                                        | 3.5    | 43                                  | 17     | 17                 | 17     | 17                     | 17     |
| 44      | 61                                         | 101    | 75                                          | 75     | 121                                        | 141    | 14                                              | 14     | 60                             | 64     | 64                                        | —      | 2.7                                        | 3.5    | 43                                  | 17     | 17                 | 17     | 17                     | 17     |
| 45      | 61                                         | 101    | 75                                          | 75     | 121                                        | 141    | 14                                              | 14     | 60                             | 64     | 64                                        | —      | 2.7                                        | 3.5    | 43                                  | 17     | 17                 | 17     | 17                     | 17     |
| 46      | 61                                         | 101    | 75                                          | 75     | 121                                        | 141    | 14                                              | 14     | 60                             | 64     | 64                                        | —      | 2.7                                        | 3.5    | 43                                  | 17     | 17                 | 17     | 17                     | 17     |
| 47      | 61                                         | 101    | 75                                          | 75     | 121                                        | 141    | 14                                              | 14     | 60                             | 64     | 64                                        | —      | 2.7                                        | 3.5    | 43                                  | 17     | 17                 | 17     | 17                     | 17     |
| 48      | 61                                         | 101    | 75                                          | 75     | 121                                        | 141    | 14                                              | 14     | 60                             | 64     | 64                                        | —      | 2.7                                        | 3.5    | 43                                  | 17     | 17                 | 17     | 17                     | 17     |
| 49      | 61                                         | 101    | 75                                          | 75     | 121                                        | 141    | 14                                              | 14     | 60                             | 64     | 64                                        | —      | 2.7                                        | 3.5    | 43                                  | 17     | 17                 | 17     | 17                     | 17     |
| 50      | 61                                         | 101    | 75                                          | 75     | 121                                        | 141    | 14                                              | 14     | 60                             | 64     | 64                                        | —      | 2.7                                        | 3.5    | 43                                  | 17     | 17                 | 17     | 17                     | 17     |
| 51      | 61                                         | 101    | 75                                          | 75     | 121                                        | 141    | 14                                              | 14     | 60                             | 64     | 64                                        | —      | 2.7                                        | 3.5    | 43                                  | 17     | 17                 | 17     | 17                     | 17     |
| 52      | 61                                         | 101    | 75                                          | 75     | 121                                        | 141    | 14                                              | 14     | 60                             | 64     | 64                                        | —      | 2.7                                        | 3.5    | 43                                  | 17     | 17                 | 17     | 17                     | 17     |
| 53      | 61                                         | 101    | 75                                          | 75     | 121                                        | 141    | 14                                              | 14     | 60                             | 64     | 64                                        | —      | 2.7                                        | 3.5    | 43                                  | 17     | 17                 | 17     | 17                     | 17     |
| 54      | 61                                         | 101    | 75                                          | 75     | 121                                        | 141    | 14                                              | 14     | 60                             | 64     | 64                                        | —      | 2.7                                        | 3.5    | 43                                  | 17     | 17                 | 17     | 17                     | 17     |
| 55      | 61                                         | 101    | 75                                          | 75     | 121                                        | 141    | 14                                              | 14     | 60                             | 64     | 64                                        | —      | 2.7                                        | 3.5    | 43                                  | 17     | 17                 | 17     | 17                     | 17     |
| 56      | 61                                         | 101    | 75                                          | 75     | 121                                        | 141    | 14                                              | 14     | 60                             | 64     | 64                                        | —      | 2.7                                        | 3.5    | 43                                  | 17     | 17                 | 17     | 17                     | 17     |
| 57      | 61                                         | 101    | 75                                          | 75     | 121                                        | 141    | 14                                              | 14     | 60                             | 64     | 64                                        | —      | 2.7                                        | 3.5    | 43                                  | 17     | 17                 | 17     | 17                     | 17     |
| 58      | 61                                         | 101    | 75                                          | 75     | 121                                        | 141    | 14                                              | 14     | 60                             | 64     | 64                                        | —      | 2.7                                        | 3.5    | 43                                  | 17     | 17                 | 17     | 17                     | 17     |
| 59      | 61                                         | 101    | 75                                          | 75     | 121                                        | 141    | 14                                              | 14     | 60                             | 64     | 64                                        | —      | 2.7                                        | 3.5    | 43                                  | 17     | 17                 | 17     | 17                     | 17     |
| 60      | 61                                         | 101    | 75                                          | 75     | 121                                        | 141    | 14                                              | 14     | 60                             | 64     | 64                                        | —      | 2.7                                        | 3.5    | 43                                  | 17     | 17                 | 17     | 17                     | 17     |
| 61      | 61                                         | 101    | 75                                          | 75     | 121                                        | 141    | 14                                              | 14     | 60                             | 64     | 64                                        | —      | 2.7                                        | 3.5    | 43                                  | 17     | 17                 | 17     | 17                     | 17     |
| 62      | 61                                         | 101    | 75                                          | 75     | 121                                        | 141    | 14                                              | 14     | 60                             | 64     | 64                                        | —      | 2.7                                        | 3.5    | 43                                  | 17     | 17                 | 17     | 17                     | 17     |
| 63      | 61                                         | 101    | 75                                          | 75     | 121                                        | 141    | 14                                              | 14     | 60                             | 64     | 64                                        | —      | 2.7                                        | 3.5    | 43                                  | 17     | 17                 | 17     | 17                     | 17     |
| 64      | 61                                         | 101    | 75                                          | 75     | 121                                        | 141    | 14                                              | 14     | 60                             | 64     | 64                                        | —      | 2.7                                        | 3.5    | 43                                  | 17     | 17                 | 17     | 17                     | 17     |
| 65      | 61                                         | 101    | 75                                          | 75     | 121                                        | 141    | 14                                              | 14     | 60                             | 64     | 64                                        | —      | 2.7                                        | 3.5    | 43                                  | 17     | 17                 | 17     | 17                     | 17     |
| 66      | 61                                         | 101    | 75                                          | 75     | 121                                        | 141    | 14                                              | 14     | 60                             | 64     | 64                                        | —      | 2.7                                        | 3.5    | 43                                  |        |                    |        |                        |        |

TABLE 3. Changes in Peripheral and Total Pulmonary Resistances after Administration of Innovar

| Patient | Systemic Resistance (Units) |                      | Pulmonary Resistance (Units) |                      | Left Ventricular Stroke Work (gm-m) |                      |
|---------|-----------------------------|----------------------|------------------------------|----------------------|-------------------------------------|----------------------|
|         | Control                     | 10 Min after Innovar | Control                      | 10 Min after Innovar | Control                             | 10 Min after Innovar |
| 1       | 36                          | 25                   | —                            | —                    | 93                                  | 84                   |
| 2       | 30                          | 25                   | —                            | —                    | 98                                  | 94                   |
| 3       | 25                          | 32                   | 5                            | 8                    | 54                                  | 42                   |
| 4       | 33                          | 31                   | 7                            | 5                    | 104                                 | 128                  |
| 5       | 67                          | 60                   | 39                           | 31                   | 15                                  | 18                   |
| 6       | 42                          | 40                   | —                            | —                    | 134                                 | 159                  |
| 7       | 45                          | 49                   | 26                           | 24                   | 80                                  | 68                   |
| 8       | 30                          | 24                   | 6                            | 6                    | 171                                 | 122                  |
| 9       | 54                          | 42                   | 27                           | 27                   | 38                                  | 41                   |
| 10      | 35                          | 34                   | 9                            | 7                    | 131                                 | 99                   |
| 11      | 43                          | 51                   | —                            | —                    | 58                                  | 50                   |
| 12      | 49                          | 52                   | 19                           | 24                   | 76                                  | 54                   |
| 13      | 17                          | 20                   | 7                            | 7                    | 76                                  | 58                   |
| 14      | 46                          | 19                   | —                            | —                    | 59                                  | 78                   |
| 15      | 57                          | 48                   | 21                           | 22                   | 65                                  | 55                   |
| 16      | 43                          | 28                   | —                            | —                    | 131                                 | 104                  |
| 17      | 25                          | 23                   | 12                           | 12                   | 97                                  | 89                   |
| 18      | 50                          | 43                   | 14                           | 11                   | 85                                  | 74                   |
| Mean    | 40.4                        | 35.8*                | 16.0                         | 15.3                 | 86.9                                | 78.8                 |
| SE†     |                             | 2.0                  |                              | 0.9                  |                                     | 4.4                  |

\* Significantly different from control mean ( $P < 0.05$ ).

† SE is the standard error of the difference between means of control and 10 minutes after Innovar.

cantly (table 2), with a corresponding decrease in systemic resistance ( $P < 0.05$  (table 3)). No changes in pulmonary pressures and resistances after Innovar were observed.  $P_{aO_2}$  during breathing of room air decreased from  $76 \pm 3$  mm Hg to  $57$  mm Hg after injection of the drug, whereas  $P_{aCO_2}$  increased from  $35 \pm 1$  mm Hg to  $40$  mm Hg, reflected in a decrease in  $pH$  from  $7.50 \pm 0.01$  to  $7.45$ . All these changes were highly significant ( $P < 0.001$ ) (table 4). Oxygen consumption also decreased significantly, from  $142$  ml/min/m<sup>2</sup> to  $126$  ml/min/m<sup>2</sup> ( $P < 0.01$ ).

All patients were moderately sedated within two to three minutes after injection; a light sleep, from which they could be easily aroused, had supervened in all by five to six minutes. Respiratory rates slowed. The patients could obey orders but were indifferent to environmental change. None was aware of pain or complained during angiocardiology. Transient ventricular extrasystoles observed during the study were related to manipulation of

catheters in cardiac chambers and disappeared upon withdrawal of the catheters.

## Discussion

### VENTILATION

Alterations in respiratory status were not unexpected, but their severity in some patients with these small doses of Innovar was surprising. The most worrisome finding, decreases in  $P_{aO_2}$  in all patients, to values as low as  $38$  mm Hg, has an important clinical implication. The need for increased inspiratory oxygen in this situation is clear. The elevation of  $P_{aCO_2}$ , while less worrisome, seems to indicate a definite decrease in alveolar ventilation. The modest increase in  $P_{CO_2}$  suggests that assisted ventilation may be necessary in certain instances when the effects of an elevated  $P_{aCO_2}$  on already-altered hemodynamics would be inadvisable. We presume that the respiratory depression results primarily from the effects of the fentanyl portion of Innovar on the respiratory center.<sup>7</sup>

TABLE 4. Changes in Blood Gases and Oxygen Consumption after Administration of Innovar

| Patient | PaO <sub>2</sub> (mm Hg) |                      | PaCO <sub>2</sub> (mm Hg) |                      | pH      |                      | O <sub>2</sub> Consumption (ml/min/m <sup>2</sup> ) |                      |
|---------|--------------------------|----------------------|---------------------------|----------------------|---------|----------------------|-----------------------------------------------------|----------------------|
|         | Control                  | 10 Min after Innovar | Control                   | 10 Min after Innovar | Control | 10 Min after Innovar | Control                                             | 10 Min after Innovar |
| 1       | 78                       | 66                   | 38                        | 41                   | 7.47    | 7.43                 | —                                                   | —                    |
| 2       | 71                       | 54                   | 33                        | 40                   | 7.48    | 7.38                 | —                                                   | —                    |
| 3       | 90                       | 56                   | 30                        | 35                   | 7.60    | 7.52                 | 135                                                 | 106                  |
| 4       | 73                       | 60                   | 35                        | 34                   | 7.47    | 7.48                 | —                                                   | —                    |
| 5       | 70                       | 50                   | 43                        | 50                   | 7.54    | 7.47                 | 154                                                 | 132                  |
| 6       | 71                       | 66                   | 39                        | 41                   | 7.45    | 7.42                 | —                                                   | —                    |
| 7       | 84                       | 66                   | 34                        | 40                   | 7.51    | 7.44                 | 157                                                 | 144                  |
| 8       | 71                       | 60                   | 33                        | 35                   | 7.47    | 7.44                 | 148                                                 | 140                  |
| 9       | 54                       | 38                   | 29                        | 37                   | 7.56    | 7.48                 | 153                                                 | 137                  |
| 10      | 85                       | 53                   | 23                        | 30                   | 7.66    | 7.56                 | 172                                                 | 140                  |
| 11      | 85                       | 69                   | 33                        | 40                   | 7.46    | 7.36                 | 132                                                 | 111                  |
| 12      | 65                       | 44                   | 34                        | 39                   | 7.52    | 7.46                 | 121                                                 | 119                  |
| 13      | 94                       | 81                   | 29                        | 40                   | 7.51    | 7.46                 | —                                                   | —                    |
| 14      | 60                       | 56                   | 40                        | 43                   | 7.46    | 7.44                 | —                                                   | —                    |
| 15      | 97                       | 41                   | 35                        | 44                   | 7.47    | 7.41                 | —                                                   | —                    |
| 16      | 68                       | 43                   | 32                        | 41                   | 7.50    | 7.40                 | —                                                   | —                    |
| 17      | 78                       | 59                   | 36                        | 43                   | 7.51    | 7.44                 | —                                                   | —                    |
| 18      | 77                       | 55                   | 42                        | 47                   | 7.45    | 7.44                 | 108                                                 | 101                  |
| Mean    | 76                       | 57*                  | 35                        | 40*                  | 7.50    | 7.45*                | 142                                                 | 126†                 |
| SE‡     |                          | 3                    |                           | 1                    |         | 0.01                 |                                                     | 3.4                  |

Significantly different from control mean: \*  $P < 0.001$ ; †  $P < 0.01$ .

‡ SE is the standard error of the difference between means of control and 10 minutes after Innovar.

#### HEMODYNAMICS

The significant decreases in systemic systolic, diastolic, and mean pressures were due solely to decreases in systemic resistance: cardiac indices remained unchanged.

Yelnosky and co-workers<sup>8</sup> have related the decrease in peripheral resistance seen with the droperidol portion of Innovar to adrenergic blockade and interference with epinephrine at alpha receptor sites. That is, droperidol would be expected to antagonize the peripheral vasoconstrictor effect without affecting the positive inotropic or chronotropic actions of epinephrine.

Determinants of myocardial inotropic activity are difficult to evaluate and understand even in *in vitro* experiments. An evaluation of this aspect of Innovar action in this study can be, at best, only a crude guess. Some clues are available, in that cardiac index, stroke volume, and stroke work all were unchanged. A disproportionate increase of left ventricular end-diastolic pressure in relation to stroke

work may reflect a negative inotropic effect.<sup>9</sup> However, there was no consistent change in LVEDP. There is certainly no suggestion in these data of a reproducible pattern of inotropic effects following Innovar. Additionally, heart rate did not change and, therefore, chronotropic activity was not altered.

It is possible that depressant effects on the cardiovascular system were masked by the stimulating effects of hypoxemia and hypercarbia. It has been shown that in intact man<sup>10,11</sup> increased activity of the sympathetic nervous system increases blood pressure, cardiac output and rate, stroke volume, and contractility. A comparison of the four patients who had PaO<sub>2</sub> values below 44 mm Hg with the five patients who had PaO<sub>2</sub>'s above 65 mm Hg reveals no trend in the hemodynamic changes that would support the idea of a significant sympathetic response to the hypoxemia.

The hypotension seen in this study deserves further comment. It is apparent that in each

of the three patients with the greatest decreases in mean arterial pressure (from 26 to 32 mm Hg) aortic stenosis was the predominant lesion. The diastolic pressures after Innovar in these three ranged from 42 to 64 mm Hg, and 42 mm Hg was the lowest diastolic pressure found in the study. Low diastolic pressures should be considered hazardous to adequate coronary perfusion, particularly in patients with aortic stenosis and associated myocardial hypertrophy who have abnormally great oxygen requirements.

The peripheral dilatation seen with Innovar may have a positive effect. The four patients with the greatest peripheral resistance values prior to the administration of Innovar (Patients 5, 9, 15, and 18), all of whom had peripheral resistance values of 50 units or more, had mitral-valve lesions. Diastolic pressures decreased modestly, but not to the levels seen in patients with aortic stenosis, while the cardiac indices either improved or remained the same. This observation may support the use of adrenergic blocking agents such as phenoxybenzamine<sup>12</sup> for patients who have certain cardiac conditions and high peripheral vascular resistances during and after cardiac surgery.

### References

1. Corssen G, Chodoff P, Domino EF, *et al.*: Neurolept analgesia and anesthesia for open-heart surgery: Pharmacologic rationale and clinical experience. *J Thorac Cardiovasc Surg* 49:901-920, 1965
2. Fox JWC, Fox EJ, Crandell DL: Neurolept-analgesia for heart and major surgery. *Arch Surg (Chicago)* 94:102-106, 1967
3. Catton DV, Brown RA: Premedication with fentanyl and droperidol. *Canad Anaesth Soc J* 16:72-76, 1969
4. Zauder HL, Del Guercio LRM, Feins N, *et al.*: Hemodynamics during neurolept analgesia (abstract). *ANESTHESIOLOGY* 26:266, 1965
5. Prys-Roberts C, Kelman GR: The influence of drugs used in neuroleptanalgesia on cardiovascular and ventilatory function. *Brit J Anaesth* 39:134-145, 1967
6. Moore JW, Kinsman JM, Hamilton WF, *et al.*: Studies on the circulation. II. Cardiac output determinations; comparison of the injection method with the direct Fick procedure. *Amer J Physiol* 89:331-339, 1929
7. Cardocki JF, Yelnosky J: A study of some of the pharmacologic actions of fentanyl citrate. *Toxic Appl Pharmacol* 6:48-62, 1964
8. Yelnosky J, Katz R, Dietrich EV: A study of some of the pharmacologic actions of droperidol. *Toxic Appl Pharmacol* 6:37-47, 1964
9. Siegel JH: The myocardial contractile state and its role in the response to anesthesia and surgery. *ANESTHESIOLOGY* 30:519-564, 1969
10. Gregg DE, Fisher LC: Section 2, *Circulation, Handbook of Physiology*. Edited by WF Hamilton and P Dow. Washington, D. C., American Physiological Society, 1963, vol 2, pp 1517-1584
11. Price HL: Effects of carbon dioxide on the cardiovascular system. *ANESTHESIOLOGY* 21: 652-663, 1960
12. Lillehei RC, Lillehei CW, Grismer JT, *et al.*: Plasma catecholamines in open-heart surgery: Prevention of their pernicious effects by pretreatment with dibenzylamine. *Surg Forum* 14:269-271, 1963

### Pediatrics

**CARDIAC CATHETERIZATION** Cardiac catheterization was performed in 45 children 2 to 6 years of age using a combination of basal sedation and axillary plexus block. Basal sedation was accomplished with droperidol, 0.3 to 0.6 mg/kg, and Omnopon, 0.7 mg/kg, administered 90 minutes prior to the axillary block. The block was accomplished using 1.25 to 1.5 mg/kg of bupivacaine (0.25 containing 1/400,000 epinephrine). A sleep dose of thiopental was given to the occasional patient who was still awake and restless at the start of catheterization. No patient required further sedation for the procedure, which often included selective angiocardiology. The technique provided an immobile arm with pronounced vasodilation which permitted the use of larger catheters, made blood sampling easier and provided undamped pressure records. The absence of ventilatory depression was confirmed by oxygen saturation values within the normal range in those patients who did not have cyanotic heart disease or right-to-left shunts. (Ross, D. M., and Williams, D. O.: *Combined Axillary Plexus Block and Basal Sedation for Cardiac Catheterization in Young Children*, *Brit. Heart J.* 32: 195 (March) 1970.)
